1  
2  
3  
4  
5  
6  
7  
8  
9  
10  
11  
12  
13  
14  
15  
16  
17  
18  
19  
20  
21  
22  
23  
24

**Fructose 1,6-bisphosphate sensing by pyruvate kinase isozymes M2 (PKM2) controls MyoD stability and myogenic differentiation**

Minchul Kim<sup>1</sup>, Yao Zhang<sup>1</sup> and Carmen Birchmeier<sup>1,#</sup>

<sup>1</sup>Developmental Biology/Signal Transduction, Max Delbrueck Center for Molecular Medicine, 13125 Berlin, Germany

# To whom correspondence should be addressed:

E-mail: [cbirch@mdc-berlin.de](mailto:cbirch@mdc-berlin.de)

Running Title: Metabolic control of MyoD stability

25 **Abstract**

26 Glucose exerts beneficial effects on myogenesis and muscle physiology. However, the  
27 mechanisms by which glucose regulates myogenesis remain ill-defined or incompletely  
28 understood. Here, we show that low glycolysis destabilizes MyoD protein, a master myogenic  
29 transcription factor. Intriguingly, MyoD is not controlled by the cellular energy status per se, but  
30 by the level of fructose 1,6-bisphosphate, an intermediate metabolite of glycolysis. Fructose 1,6-  
31 bisphosphate is sensed by pyruvate kinase M2 (PKM2). In the presence of fructose 1,6-  
32 bisphosphate, PKM2 form tetramers that sequester the Huwe1 E3 ubiquitin ligase to the cytoplasm.  
33 Reduced fructose 1,6-bisphosphate levels dissociate the tetramer, releasing Huwe1 into the nucleus  
34 where it targets MyoD for degradation. Genetic or pharmacological modulation of PKM2-Huwe1  
35 axis restores myogenic differentiation in glucose restricted conditions. Our results show that  
36 glucose metabolism directly regulates protein stability of a key myogenic factor and provide a  
37 rationale for enhancing myogenesis.

38

39 Keywords: MyoD / PKM2 / Huwe1 / Glucose / Muscle

40

41

42

43

44

45

46

47

48

49

50

51

52

53

54

55

## 56 **Introduction**

57 Glycolysis and oxidative phosphorylation are basic elements of cellular bioenergetics. However,  
58 a shutdown of glycolysis can severely affect cellular functions even in the presence of other fuels  
59 that produce ample energy. This is because intermediates of glycolysis have additional, non-  
60 bioenergetic roles. For instance, nuclear-cytoplasmic levels of the intermediate metabolite acetyl-  
61 CoA is rate-limiting for histone acetylation (Moussaieff et al., 2015). Thus, glycolytic flux and the  
62 resulting concentration of acetyl-CoA affects the epigenetic landscape, cell proliferation and  
63 differentiation. Additional glycolytic metabolites directly interact with or post-translationally  
64 modify proteins, thereby altering their activities (Ashizawa et al., 1991, Dayton et al., 2016,  
65 Bollong et al., 2018, Li et al., 2019). Thus, glucose metabolism plays a crucial role in many  
66 biological processes, acting through bioenergetic and non-bioenergetic mechanisms to control  
67 tumorigenesis, tissue repair and the function of the immune system (Pearce and Pearce, 2013, Hsu  
68 and Sabatini, 2008, Cairns et al., 2011, Folmes et al., 2012).

69 The skeletal muscle is the major sink for blood glucose and an important tissue for glucose  
70 homeostasis. Muscle fiber growth can occur by accretion of new nuclei to the fiber, i.e. fusion of  
71 myoblasts derived from muscle stem cells, or by increased fiber protein synthesis. Glucose can  
72 affect both aspects, but the precise effect and associated mechanism are different at distinct stages  
73 of myogenesis.

74 Myogenic cells progress through several stages in order to differentiate that are characterized by  
75 the expression of distinct transcription factors (Yin et al., 2013, Brack and Rando, 2012, Comai  
76 and Tajbakhsh, 2014, Buckingham and Rigby, 2014). Adult muscle stem cells express the  
77 transcription factor Pax7, which is essential for the survival and maintenance of muscle stem cell  
78 pool (von Maltzahn et al., 2013, Oustanina et al., 2004). Upon activation, these cells start to express  
79 the transcription factors MyoD and/or Myf5. Activated stem cells can either return to quiescence  
80 or further progress into differentiation (Bentzinger et al., 2012). Finally, myoblasts turn on the  
81 transcription factor myogenin (MyoG), a marker of terminal differentiation, and exit the cell cycle  
82 to fuse into myotubes. Previous studies have shown that the glucose promotes activation of  
83 quiescent muscle stem cells and differentiation of myoblasts in part by regulating histone  
84 acetylation (Fulco et al., 2008, Yucel et al., 2019, Ahsan et al., 2020, Theret et al., 2017). In  
85 differentiated myotubes, glucose inhibits the Foxo transcription factors whose activity induces the  
86 expression of muscle-specific ubiquitin ligases that result in atrophy (Sandri et al., 2004, Meng et

87 al., 2017). Knowledge about the molecular mechanisms underpinning these effects can help to  
88 design better strategies to enhance myogenesis, for instance in a disease setting.  
89 Here, we aimed to identify a direct mechanistic link between glucose and key myogenic factor(s)  
90 in order to better understand the molecular mechanism by which glucose promotes differentiation  
91 of myoblasts. We observe that the protein stability of MyoD depends on glucose and define here  
92 the responsible pathway. In particular, we show that fructose 1,6-bisphosphate inhibits the E3  
93 ubiquitin ligase Huwe1 to stabilize MyoD. Fructose 1,6-bisphosphate is sensed by the M2 isoform  
94 of pyruvate kinase that in turn interacts with Huwe1 to control its subcellular location.

95

## 96 **Results and discussion**

97

### 98 **Glucose regulates MyoD protein stability**

99 Consistent with the previous report (Fulco et al., 2008), lowering of the glucose concentration in  
100 the medium to 5mM impaired differentiation of cultured C2C12 myoblast cells (Fig. 1A). This  
101 was accompanied by a reduced expression of the terminal differentiation markers troponin-T and  
102 muscle creatine kinase (Mck). Interestingly, MyoD protein levels were drastically reduced in low  
103 glucose (Fig. 1A), but MyoD mRNA was unchanged (Fig. 1B). In contrast, both MyoG protein  
104 and mRNA were significantly downregulated. MyoG is a target of MyoD (Deato et al., 2008),  
105 indicating that the strong downregulation of MyoD protein is an important mechanism by which  
106 low glucose impairs differentiation.

107 To further investigate the regulation of MyoD by glucose, we cultured proliferating C2C12 cells  
108 in media with different glucose concentrations overnight. MyoD protein levels were similar in  
109 25mM and 10mM glucose but were markedly reduced in 5mM and 2.5mM (Fig. 1C, western blot).  
110 In contrast, MyoD mRNA remained comparable within a range of 2.5-25mM glucose and was  
111 only affected in a pronounced manner when glucose levels decreased even further (Fig. 1C, graph).  
112 Thus, MyoD protein quantity is dynamically regulated in a range of glucose concentrations that is  
113 physiologically relevant (4-7mM in normally fed mice). MyoD protein was depleted within 4  
114 hours when glycolysis was acutely blocked by 25mM 2-Deoxyglucose (2DG) in glucose-free  
115 medium, but MyoD mRNA was unaffected in this time window (Fig. 1D). Further supporting a  
116 non-transcriptional control, 2DG also depleted Flag-MyoD protein that was produced from a  
117 transfected plasmid (Fig. 1E). Unlike low glucose concentrations, amino acid starvation did not

118 affect MyoD protein levels, indicating that a shutdown of glycolysis specifically regulates MyoD  
119 levels (Fig. 1F).

120 Since transcriptional mechanism cannot account for the changes in MyoD levels, we tested  
121 whether the stability of MyoD protein is affected by low glucose. Addition of cycloheximide, an  
122 inhibitor of translation, showed that the turnover of MyoD protein was higher in 5mM glucose  
123 than in 25mM (Fig. 1G). Furthermore, in the presence of the proteasome inhibitor MG132, MyoD  
124 protein levels were restored when glycolysis was acutely blocked by 2DG (Fig. 1H). Finally, we  
125 found that MyoD ubiquitin levels were substantially higher in cells cultured in 5mM glucose than  
126 in 25mM (Fig. 1I). We conclude that glucose regulates MyoD protein stability through the  
127 ubiquitination-proteasome pathway.

128

### 129 **Cellular energy stress does not regulate MyoD stability**

130 We next sought to characterize the mechanism that mediates the effect of glucose on MyoD  
131 stability. AMP-activated kinase (AMPK) and Sirt1 (NAD<sup>+</sup>-dependent deacetylase) are well-  
132 established sensors of cellular energy stress, and account for many aspects of the biological  
133 responses to energy starvation (Canto et al., 2010, Fulco and Sartorelli, 2008). We mutated  
134 AMPK $\alpha$ 1/2, the genes encoding the catalytic subunits of the AMPK complex using CRISPR-Cas9  
135 to generate two independent mutant clones. MyoD was unstable in the presence of 2DG in both  
136 mutant clones (Fig. 2A). Furthermore, the specific Sirt1 inhibitor (EX527) did not restore MyoD  
137 protein stability (Fig. 2B). Thus, none of the well-known cellular energy sensors is responsible for  
138 the de-stabilization of MyoD when glycolysis is blocked.

139 This raised the possibility that not energy stress *per se*, but the absence of glycolysis and thus the  
140 depletion of specific glycolytic intermediates regulates MyoD stability. To test this, we replaced  
141 glucose with pyruvate as energy source and analyzed phosphorylation of AMPK to monitor the  
142 cellular energy status. In the presence of 2DG, AMPK is phosphorylated, indicating that the cells  
143 experience energy stress. With increasing concentrations of added pyruvate, AMPK  
144 phosphorylation declined. In particular, at a pyruvate concentration of 2.5mM, AMPK  
145 phosphorylation had returned to baseline levels, indicating that the energy metabolism of the cell  
146 was restored. However, MyoD protein remained destabilized at all pyruvate concentrations (Fig.  
147 2C). This result suggested that an intermediate of the glycolytic pathway produced by glucose but  
148 not pyruvate regulates MyoD stability (Fig. 3A).

149

### 150 **Fructose 1,6-bisphosphate sensing by PKM2 stabilizes MyoD**

151 Fructose 1,6-bisphosphate is produced from fructose-6-phosphate (F6P) at the third step of  
152 glycolysis. The concentration of fructose 1,6-bisphosphate can be sensed by its binding to the  
153 isoform 2 of the muscle Pyruvate Kinase (PKM2) (Fig. 3A). PKM2 is expressed in proliferating  
154 myoblasts, whereas due to alternative splicing the PKM1 isoform is produced in differentiated  
155 myofibers (David et al., 2010). Binding of fructose 1,6-bisphosphate to PKM2 induces  
156 tetramerization of the dimeric/monomeric PKM2, which augments its enzymatic activity and  
157 promotes its cytoplasmic localization. On the other hand, absence of fructose 1,6-bisphosphate  
158 dissociates the tetramer, resulting in lower enzymatic activity of PKM2 and its translocation into  
159 the nucleus (Dayton et al., 2016) (Fig. 3B). This delicate regulation of PKM2 activity and  
160 localization is known to be required for cell proliferation (Israelsen et al., 2013, Dayton et al.,  
161 2016). However, whether PKM2 integrates cellular metabolic signals to regulate differentiation is  
162 unknown.

163 Interestingly, supplying fructose 1,6-bisphosphate, but not its downstream products G3P  
164 (glyceraldehyde 3-phosphate) or DHAP (dihydroxyacetone phosphate), protected MyoD from  
165 degradation in the presence of 2DG (Fig. 3C). To test if dissociation of the PKM2 tetramer  
166 contributes to the regulation of MyoD turnover, we used DASA-58 or TEPP-46, two compounds  
167 that stabilize the PKM2 tetramer (Anastasiou et al., 2012). Remarkably, both DASA-58 and TEPP-  
168 46 stabilized MyoD in the presence of 2DG (Fig. 3D). Thus, in the metabolic pathway that  
169 regulates MyoD stability, fructose 1,6-bisphosphate has a key regulatory role and is sensed by  
170 PKM2.

171

### 172 **The E3 ubiquitin ligase Huwe1 regulates MyoD stability during glucose deprivation**

173 To gain further mechanistic insight, we next sought for the responsible ubiquitin E3 ligase that  
174 destabilizes MyoD in the presence of low glucose. Several E3 ligases including Huwe1 have been  
175 suggested to target MyoD (Noy et al., 2012). When Huwe1 was depleted using two different  
176 siRNAs, MyoD protein remained stable in the presence of 2DG (Fig. 4A). In contrast, two other  
177 E3 ligases known to target MyoD, Atrogin-1 or Upf1 (Lagirand-Cantaloube et al., 2009, Feng et  
178 al., 2017), were not responsible for MyoD degradation in response to 2DG: inhibition of Atrogin-

179 1 activity by MLN4924 or depletion of Upf1 by siRNA failed to protect MyoD from degradation  
180 in response to 2DG in myoblasts (Fig. EV1A). Thus, Huwe1 destabilizes MyoD in low glucose.

181

### 182 **PKM2 tetramer regulates the nucleocytoplasmic localization of Huwe1**

183 Huwe1 is normally located in the cytoplasm, whereas MyoD is mostly nuclear. Nuclear  
184 translocation of Huwe1 has been reported in response to DNA damage or during spermatogenesis  
185 (Wang et al., 2014, Bose et al., 2017). Interestingly, Western blotting indicated that the levels of  
186 nuclear Huwe1 increased when cells were either treated with 2DG (Fig. 4B) or cultured in low  
187 glucose (Fig. 4C). We confirmed this by immunostaining experiments. In untreated cells, Huwe1  
188 showed a heterogeneous distribution: in most cells Huwe1 displayed a diffuse cytoplasmic  
189 location, but occasionally cells with nuclear Huwe1 could be observed. In contrast, we observed a  
190 pronounced enrichment of Huwe1 in nuclei of 2DG treated cells (Fig. 4D). Critically, DASA-58  
191 or TEPP-46 blocked nuclear Huwe1 translocation in response to 2DG (Fig. 4E), raising the  
192 possibility that the PKM2 tetramer binds Huwe1 and thus sequesters it in the cytoplasm.

193 We investigated this further by depleting PKM2 using siRNA, which resulted in an enhanced  
194 nuclear localization of Huwe1 (Fig. 4F). Immunostaining in Huwe1 siRNA transfected cells  
195 confirmed the specificity of Huwe1 antibody (Fig. EV2A). The increased level of nuclear Huwe1  
196 was accompanied by a decreased basal level of MyoD in the absence of 2DG (Fig. EV2B).  
197 Notably, the degree of reduction of MyoD levels in the absence of 2DG correlated with the  
198 efficiency of the siRNA-induced PKM2 downregulation, indicating that incomplete depletion of  
199 PKM2 might have resulted in the presence of residual MyoD. In accordance, remaining MyoD  
200 was still destabilized by 2DG. PKM2 depletion did not affect basal MyoD mRNA levels (Fig.  
201 EV2C). Of note, despite multiple attempts using a number of gRNA sequences we failed to obtain  
202 PKM2 knock-out clones, retrieving only clones with reduced PKM2 protein levels, possibly  
203 heterozygous mutant clones. Therefore, PKM2 appears to be essential in C2C12 cells.

204 Next, we assessed whether PKM2 and Huwe1 physically interact. We found that Flag-tagged  
205 wildtype PKM2 co-immunoprecipitated endogenous Huwe1. In contrast, the S473Y mutant of  
206 PKM2 that is unable to bind fructose 1,6-bisphosphate (Chaneton et al., 2012) failed to interact  
207 with Huwe1 (Fig. 4G). Whether PKM2 and Huwe1 interact directly or via other protein(s) needs  
208 further investigation. Taken together, these results suggest that in the presence of fructose 1,6-  
209 bisphosphate, the PKM2 tetramer acts as a sink of Huwe1 in the cytoplasm (see a summary of the



210 model in Fig. 4H). When cellular fructose 1,6-bisphosphate drop, the PKM2 tetramers dissociate  
211 and release Huwe1, which unleashes nuclear Huwe1 activity.

212

### 213 **Depletion of Huwe1 restores myogenic differentiation in low glucose condition**

214 We next tested if inhibition of the PKM2-Huwe1 pathway reinstates differentiation in glucose  
215 restricted conditions. Depletion of Huwe1 by siRNA partially rescued myogenic differentiation in  
216 low glucose as assessed by MyoG immunostaining, a marker for onset of differentiation (Fig. 5A;  
217 quantified in 5B). In contrast, differentiation in high glucose was unaffected when Huwe1 was  
218 transiently depleted by siRNA. This is in contrast to a previous study using stable Huwe1 depletion  
219 by shRNA, which had reported impaired differentiation of C2C12 cells (Li et al., 2015). We also  
220 observed attenuated differentiation when we used shRNA targeting the same sequence of the  
221 Huwe1 transcript that is recognized by the siRNA used (Fig. EV3), indicating that long-term  
222 inhibition of Huwe1 has indirect effects on myogenic differentiation. Consistent with a previous  
223 report, PKM2 activators (DASA-58 or TEPP-46) strongly impaired cell proliferation when used  
224 on sub-confluent cells (Anastasiou et al., 2012). We therefore used confluent cultures and induced  
225 differentiation with or without TEPP-46 in the presence of low/high glucose. The addition of  
226 TEPP-46 partially restored myogenic differentiation in low glucose (Fig. 5A and 5C). In summary,  
227 both Huwe1 siRNA and PKM2 activators substantially but not completely restored MyoG  
228 induction in low glucose. The remaining effect might be mediated by other pathways such as  
229 AMPK and/or histone acetylation.

230 To test the effect of Huwe1 depletion in more physiologically relevant setting, we cultured muscle  
231 stem cells associated with muscle fibers. In this *ex vivo* system, muscle stem cells spontaneously  
232 activate and proliferate, forming colonies on top of the myofibers that contain undifferentiated and  
233 differentiating cells (Fig. 5D, left diagram). To avoid potential problems in stem cell activation,  
234 fibers were cultured in 25mM glucose during the first 24 hours, and subsequently transferred to  
235 either low or high glucose medium. To confirm that lowering the glucose concentration also  
236 impairs differentiation of the muscle stem cells in fiber culture, we determined the ratio of Pax7<sup>+</sup>  
237 (undifferentiated) to MyoG<sup>+</sup> (differentiated) cells in the colonies (Fig. EV4A). Differentiation was  
238 reduced in 5mM glucose and strongly impaired in 2.5mM glucose. Notably, low glucose did not  
239 affect the number of cells in the colonies, indicating that a shift to low glucose at 24 hours of  
240 culture did not impair cell proliferation (Fig. EV4B). Next, we tested whether siRNA-mediated



241 depletion of Huwe1 restored differentiation in low glucose. We observed a significant increase in  
242 the proportion of MyoG-expressing cells in 2.5mM but not in 25mM glucose after siRNA  
243 treatment (Fig. 5D, right graph). In sum, Huwe1 mediates the effect of glucose on myogenic  
244 differentiation in both monolayer cultures and primary muscle stem cells associated with cultured  
245 myofibers; the latter is thought to model *in vivo* situation.

246

### 247 **PKM2-MyoD axis as a node controlling myogenic differentiation**

248 Here we identified a new metabolic mechanism acting in myoblasts which links glucose  
249 availability to differentiation. Single-cell RNA-Sequencing of muscle stem cells showed that  
250 quiescent muscle stem cells express low level of mRNAs encoding glycolytic enzymes like PKM2  
251 (Dell'Orso et al., 2019). Furthermore, MyoD protein is also absent in quiescent stem cells. As stem  
252 cells progress into activated state, MyoD protein needs to be precisely regulated in order to control  
253 the balance between self-renewal or terminal differentiation. We show here that PKM2 participates  
254 in such regulatory mechanisms. In addition to fructose 1,6-bisphosphate, the equilibrium of PKM2  
255 tetramers/dimers is controlled by diverse intra- and extracellular cues such as growth factors,  
256 serine and ROS (Anastasiou et al., 2011, Hitosugi et al., 2009, Yang et al., 2012, Chaneton et al.,  
257 2012, Keller et al., 2012). Thus, the PKM2-MyoD axis might act as the nexus that integrates  
258 information about dynamic cellular environment and connect them to cell fate decision.

259

## 260 **Materials and Methods**

### 261 **Cell culture and nutrient starvation**

262 C2C12 and 293T cells (both from ATCC) were maintained in high glucose DMEM media  
263 (Thermofisher 11965092) supplemented with heat inactivated 10% FBS (Sigma F7524) and  
264 penicillin/streptomycin (Sigma P4333) at 37°C and 5% CO<sub>2</sub>. To induce differentiation, C2C12  
265 cells were washed twice with PBS, and DMEM media containing 2% horse serum (Thermofisher  
266 16050122) and penicillin/streptomycin was added. Differentiation media was replenished every  
267 two days. To modulate glucose concentration in the media, we used glucose and pyruvate free  
268 DMEM (Thermofisher 11966025), which was supplemented with indicated concentration of  
269 glucose (Thermofisher A2494001).

270 To induce acute energy stress, 25mM 2-deoxyglucose (Sigma D8375) was added to glucose and  
271 pyruvate free DMEM media. For differentiation assays, glucose and pyruvate free media was

272 further supplemented with 1mM pyruvate (Thermofisher 11360070). To induce amino acid  
273 starvation, cells were washed twice with EBSS (Thermofisher 14155063) and incubated with  
274 EBSS buffer supplemented with 4.5g/L glucose, 1mM pyruvate and 10% FBS for one hour. FBS  
275 was dialyzed overnight against EBSS to deprive amino acid in the serum. For no starvation control,  
276 50X amino acid mixture (Sigma M5550-100ML) was added.

277

### 278 **siRNA transfection**

279 For siRNA transfection, we used 20 $\mu$ M siRNA duplexes using Lipofectamine RNAi max  
280 (Invitrogen) according to manufacturer's guideline. siRNAs against PKM2 were purchased from  
281 Thermofisher (catalog number 4390771; assays numbers s71678 and s201789). Scrambled control  
282 and siRNAs against Upf1 and Huwe1 were synthesized from Eurofins with dTdT overhang on  
283 both ends. The targeting sequences were the followings:

284 Scrambled 5'- CGUACGCGGAAUACUUCG A-3'

285 Mouse Upf1 #1 5'-GCUGCCAUGAACAUCCCUAAU-3'

286 Mouse Upf1 #2 5'-GCAGCCAAUGUGGAGAAGAU-3'

287 Mouse Huwe1 #1 5'-CCGCACUGUGUAAACCAGAU-3'

288 Mouse Huwe1 #2 5'-GCACUGCUCAUCAAGAUGUU-3'

289

### 290 **Constructs and DNA transfection**

291 Human PKM2 wild-type construct was purchased from Addgene (44242) and sub-cloned to  
292 pCMV-Tag2B plasmid (Agilent Technologies). PKM2 S437Y mutant was generated by site-  
293 directed mutagenesis and sub-cloned to the same plasmid. Mouse MyoD was cloned from E13.5  
294 whole mouse embryo cDNA and confirmed by sequencing. Afterwards, MyoD was sub-cloned to  
295 pCMV-Tag2B plasmid. Plasmid transfection was performed using Fugene HD (Promega E2311)  
296 according to the manufacture's guideline.

297

### 298 **Generation of stable cell lines**

299 Generation of Ampk $\alpha$ 1/2 dKO cells: Plasmids containing Cas9, GFP and gRNAs against mouse  
300 Ampk $\alpha$ 1 (79004) and Ampk $\alpha$ 2 (79005) were obtained from Addgene. C2C12 cells were first  
301 transfected with Ampk $\alpha$ 1 gRNA and sorted with GFP. After culturing the sorted cells for 2 weeks,

302 cells were transfected with Ampk $\alpha$ 2 gRNA and GFP sorted. These cells were diluted to single cell  
303 and seeded into 96-well plates. Ampk $\alpha$ 1/2 dKO cells were screened by Western blotting.  
304 Huwe1 stable knockdown: The same targeting sequences as for siRNA studies were cloned to  
305 pLKO.1 puro plasmid (Addgene 8453). As control, pLKO.1 puro plasmid containing scrambled  
306 sequence was used (Sigma SHC016-1EA). pLKO.1 constructs were co-transfected with psPAX2  
307 (Addgene 12260) and VsvG (Addgene 8454) in 4:3:1 ratio to 293T cells. We changed the media  
308 6 hours after transfection and collected the media for the next 48 hours. Supernatants were cleared  
309 by centrifugation at 1,800rcf for 10 minutes. Target cells were transduced with the supernatant  
310 containing 5 $\mu$ g/ml polybrene (Millipore TR-1003-G). Selection was started 24 hours after  
311 transduction with 3 $\mu$ g/ $\mu$ l puromycin (Sigma P8833).

312

### 313 **Streptolysin-O experiment**

314 Streptolysin-O (SLO) was purchased from Sigma (S5265). SLO was reconstituted in 1ml pure  
315 water (Sigma W3513), aliquoted and stored in -20°C until future use. Cells were washed twice  
316 with 1X HBSS (Thermofisher 14175-053) and HBSS containing SLO (50X) was added. Cells  
317 were incubated in the incubator for 2-3 minutes. The optimal time was determined by checking  
318 one dish under the microscope after SLO treatment. After removing SLO, cells were gently washed  
319 twice with PBS and incubated with indicated media for 2 hours. Glycolytic intermediates were  
320 purchased from Sigma: Fructose 1,6-bisphosphate (F6803), DHAP (D7137) and G3P (39705).

321

### 322 **Cell lysis, immunoprecipitation, ubiquitination assay and Western blotting**

323 Harvested cells were resuspended in lysis buffer (50mM Tris-Cl pH 7.5, 150mM NaCl, 1mM  
324 MgCl<sub>2</sub>, 1% NP40) supplemented with protease inhibitor (Roche 11836170001) and phosphatase  
325 inhibitor cocktail (Sigma P5726) and incubated on ice for 20 minutes. Lysates were centrifuged at  
326 25,000rcf for 20 minutes on 4°C, and supernatants were transferred to new tubes. Protein  
327 concentration was measure by Bradford method (Bio-Rad 5000006) and boiled in Laemmli buffer  
328 for 10 minutes.

329 For immunoprecipitation, 2mg of cleared lysates were incubated with 3 $\mu$ g anti-Flag antibody  
330 (Sigma F3165) for 2 hours at 4°C with constant rotation. 20 $\mu$ l Dynabeads Protein G (Invitrogen  
331 10004D) were added and incubated for another hour at 4°C. Beads were washed four times with

332 lysis buffer containing different NaCl concentrations (150mM, 300mM, 500mM and 150mM)  
333 using magnetic stand. After removing last washing buffer, beads were boiled.  
334 For ubiquitination assay, cells were treated with 20 $\mu$ M MG132 (Sigma M8699) for 4 hours before  
335 harvesting. Cells were lysed in RIPA buffer (50mM Tris-Cl pH 7.5, 150mM NaCl, 1mM MgCl<sub>2</sub>,  
336 1% SDS and 0.1% Sodium Deoxycholate). Concentration was measured by BCA method  
337 (Thermofisher 23225). 3mg of cleared lysates were incubated with 3 $\mu$ g antibody against MyoD  
338 (Santa cruz sc-32758) or mouse IgG (Cell Signaling 5415) overnight at 4°C. After bead incubation,  
339 beads were washed 4 times with RIPA buffer and boiled.  
340 Boiled samples were fractionated on SDS-PAGE gel, transferred to 0.45 $\mu$ m pore nitrocellulose  
341 membranes (GE healthcare), blocked for one hour with 5% skim milk (Sigma 70166) in PBST and  
342 overnight incubated with primary antibodies diluted in 5% BSA (Sigma A2153) in filtered PBST.  
343 After three times washing with PBST, membranes were treated with HRP-conjugated secondary  
344 antibodies (Cell Signaling 7074 and 7076) diluted at 1:5000 in skim milk for one hour at RT. After  
345 three times washing, membranes were developed using ECL primer solution (GE healthcare  
346 RPN2236). The primary antibodies used in this study are the followings: Muscle Creatine Kinase  
347 (Abcam ab54637, 1:2000), Troponin-T (Sigma T6277, 1:1000), MyoG (Santa Cruz sc-12732,  
348 1:500), MyoD (Santa cruz sc-32758, 1:250),  $\beta$ -actin (Cell Signaling 4970, 1:1000), S6K (Cell  
349 Signaling 2708, 1:1000), phospho-S6K (Cell Signaling 97596, 1:1000), Ubiquitin (Abcam  
350 ab7780, 1:2000), AMPK $\alpha$  (Cell Signaling 2532, 1:1000), phospho-AMPK $\alpha$  (Cell Signaling 2531,  
351 1:500), Lamin B (Abcam ab16048, 1:2000),  $\beta$ -Tubulin (Cell Signaling 2128, 1:2000), Huwe1  
352 (Abcam ab70161, 1:1000) and PKM2 (Cell Signaling 4053, 1:1000).

353

#### 354 **Reverse transcription and quantitative PCR**

355 Harvested cell pellets were resuspended in 1ml Trizol reagent (Invitrogen) and RNA was isolated  
356 according to manufacturer's guideline. 1 $\mu$ g RNA was reverse transcribed using random hexamer  
357 primer (Thermofisher N8080127) and Protoscript Reverse Transcriptase enzyme (NEB M0368).  
358 cDNA was dilute in water in 1:5 ratio. 1 $\mu$ l sample was used for one quantitative PCR reaction  
359 using 2X Cyber green mix (Thermofisher) and CFX96 (Biorad). The qPCR primers used in this  
360 study are the following:

361  $\beta$ -actin For: 5'-GGCTGTATTCCCCTCCATCG-3'

362  $\beta$ -actin Rev: 5'-CCAGTTGGTAACAATGCCATGT-3'

363 MyoD For: 5'-CCACTCCGGGACATAGACTTG-3'

364 MyoD Rev: 5'-AAAAGCGCAGGTCTGGTGAG-3'

365 MyoG For: 5'-GAGACATCCCCCTATTTCTACCA-3'

366 MyoG Rev: 5'-GCTCAGTCCGCTCATAGCC-3'

367

### 368 **Nucleocytoplasmic fractionation**

369 Harvested cells were resuspended in hypotonic buffer (20mM HEPES, pH 7.9, 2mM KCl and  
370 1mM DTT) and incubated on ice for 30 minutes. Triton X-100 was added to final concentration  
371 of 0.3% and briefly vortexed for 10 seconds. After one-minute centrifugation at 25,000rcf on 4°C,  
372 supernatants (cytosolic fractions) were transferred to new tubes. The pellets were washed once  
373 with hypotonic buffer and once with PBS. Hypertonic buffer (5mM HEPES, pH 7.9, 1.5mM  
374 MgCl<sub>2</sub>, 500mM NaCl, 0.2mM EDTA and 0.5mM DTT) was then added, and pellets were vortexed  
375 every five minutes at least 7-8 times. Pellets were centrifuged at 25,000rcf for 20 minutes on 4°C,  
376 and supernatants (nuclear fractionation) were transferred to new tubes.

377

### 378 **Immunostaining**

379 Cells were cultured on coverslips coated with gelatin (Sigma G1393). After aspirating the media,  
380 cells were washed once with PBS and fixed with 4% PFA for 15 minutes on room temperature  
381 (RT). Fixed cells were permeabilized with 0.3% Triton X-100 for 10 minutes on RT and washed  
382 once with PBS. Cells were blocked with 3% BSA in PBS for one hour on RT. Primary antibodies  
383 were diluted in blocking buffer, added on coverslips in humid chamber, and incubated overnight  
384 in cold room. After three times washing with PBS (10 minutes each), Cy2- or Cy3-conjugated  
385 secondary antibodies and DAPI (Sigma D9542) were diluted in blocking buffer and treated on the  
386 cells for one hour on RT. Samples were washed three times and mounted (Thermofisher 9990412).  
387 Primary antibodies used in this study are anti-Huwei1 (Bethyl A300-486A, 1:500) and MyoG  
388 (same as Western blot, 1:200). Secondary antibodies were from Jackson Immunoresearch (1:500).

389

### 390 **Myofiber culture and immunostaining**

391 Myofibers from extensor digitorum longus (EDL) muscle were isolated as described before  
392 (Vogler et al., 2016). Briefly, dissected EDL muscles were digested with 0.2% Collagenase I  
393 (Sigma C0130) dissolved in high glucose DMEM media for 90 minutes at 37°C with gentle

394 shaking. Digested fibers were transferred to high glucose DMEM media (without Collagenase I)  
395 and incubated for 30 minutes at 37°C. Single fibers were liberated by gently triturating with large  
396 diameter pastier pipet. Isolated fibers were transferred to high glucose DMEM supplemented with  
397 10% heat inactivated horse serum, 1% chick embryo extract (MP bio MP 2850145) and  
398 Penicillin/Streptomycin. One hour after isolation, fibers were transfected with siRNAs against  
399 control or Huwe1. 24 hours later, media were removed, washed once with PBS, and replaced to  
400 the same media but with different glucose concentration. Fibers were cultured for another 72 hours  
401 until fixation. Immunostaining of myofibers were carried out using the same procedure as cell  
402 immunostaining except the following modifications; washing was performed with PBS plus  
403 0.025% Tween-20, and HS/BSA solution was used for blocking (3% horse serum, 0.25% BSA  
404 and 0.1% Triton X-100 in PBS). The primary antibodies used for this experiment were MyoG  
405 (same as for cell immunostaining, 1:200) and Pax7 (homemade, 1:50). Pax7 antibody was  
406 previously described (Muller et al., 2002).

407

#### 408 **Acquisition of fluorescence images**

409 Fluorescence was visualized by laser-scanning microscopy (LSM700, Carl-Zeiss) using Zen 2009  
410 software. Images were processed using ImageJ and Adobe Photoshop and assembled using Adobe  
411 Illustrator.

412

#### 413 **Other chemicals**

414 Other chemicals or reagents used in this study were Cycloheximide (Sigma 01810), EX527  
415 (Selleckchem S1541), MLN4924 (Selleckchem HY-00062), DASA-58 (Selleckchem S7928) and  
416 TEPP-46 (Axon Medchem 2240).

417

#### 418 **Acknowledgement**

419 We thank Bettina Brandt for her technical assistance. M.K. was supported by post-doctoral  
420 fellowships from the Alexander von Humboldt Foundation and AFM-Telethon. This work was  
421 funded by Helmholtz society (to C.B).

422

423

424



425 **Author contributions**

426 M.K conceived the project, conducted the experiment, and analyzed the data. Y.Z. performed the  
427 experiment in Fig. EV4. M.K and C.B wrote the manuscript.

428

429 **Declaration of interest**

430 The authors do not have any conflicting interests.

431

432 **References**

- 433 AHSAN, S., RAVAL, M. H., EDERER, M., TIWARI, R., CHAREUNSOUK, A. & RODGERS, J. T. 2020. Metabolism  
434 of glucose and glutamine is critical for skeletal muscle stem cell activation. *bioRxiv*,  
435 2020.07.28.225847.
- 436 ANASTASIOU, D., POULOGIANNIS, G., ASARA, J. M., BOXER, M. B., JIANG, J. K., SHEN, M., BELLINGER, G.,  
437 SASAKI, A. T., LOCASALE, J. W., AULD, D. S., THOMAS, C. J., VANDER HEIDEN, M. G. & CANTLEY, L.  
438 C. 2011. Inhibition of pyruvate kinase M2 by reactive oxygen species contributes to cellular  
439 antioxidant responses. *Science*, 334, 1278-83.
- 440 ANASTASIOU, D., YU, Y., ISRAELSEN, W. J., JIANG, J. K., BOXER, M. B., HONG, B. S., TEMPEL, W., DIMOV, S.,  
441 SHEN, M., JHA, A., YANG, H., MATTAINI, K. R., METALLO, C. M., FISKE, B. P., COURTNEY, K. D.,  
442 MALSTROM, S., KHAN, T. M., KUNG, C., SKOUMBOURDIS, A. P., VEITH, H., SOUTHALL, N., WALSH,  
443 M. J., BRIMACOMBE, K. R., LEISTER, W., LUNT, S. Y., JOHNSON, Z. R., YEN, K. E., KUNII, K.,  
444 DAVIDSON, S. M., CHRISTOFK, H. R., AUSTIN, C. P., INGLESE, J., HARRIS, M. H., ASARA, J. M.,  
445 STEPHANOPOULOS, G., SALITURO, F. G., JIN, S., DANG, L., AULD, D. S., PARK, H. W., CANTLEY, L.  
446 C., THOMAS, C. J. & VANDER HEIDEN, M. G. 2012. Pyruvate kinase M2 activators promote  
447 tetramer formation and suppress tumorigenesis. *Nat Chem Biol*, 8, 839-47.
- 448 ASHIZAWA, K., WILLINGHAM, M. C., LIANG, C. M. & CHENG, S. Y. 1991. In vivo regulation of monomer-  
449 tetramer conversion of pyruvate kinase subtype M2 by glucose is mediated via fructose 1,6-  
450 bisphosphate. *J Biol Chem*, 266, 16842-6.
- 451 BENTZINGER, C. F., WANG, Y. X. & RUDNICKI, M. A. 2012. Building muscle: molecular regulation of  
452 myogenesis. *Cold Spring Harb Perspect Biol*, 4.
- 453 BOLLONG, M. J., LEE, G., COUKOS, J. S., YUN, H., ZAMBALDO, C., CHANG, J. W., CHIN, E. N., AHMAD, I.,  
454 CHATTERJEE, A. K., LAIRSON, L. L., SCHULTZ, P. G. & MOELLERING, R. E. 2018. A metabolite-derived  
455 protein modification integrates glycolysis with KEAP1-NRF2 signalling. *Nature*, 562, 600-604.
- 456 BOSE, R., SHENG, K., MOAWAD, A. R., MANKU, G., O'FLAHERTY, C., TAKETO, T., CULTY, M., FOK, K. L. &  
457 WING, S. S. 2017. Ubiquitin Ligase Huwe1 Modulates Spermatogenesis by Regulating  
458 Spermatogonial Differentiation and Entry into Meiosis. *Sci Rep*, 7, 17759.
- 459 BRACK, A. S. & RANDO, T. A. 2012. Tissue-specific stem cells: lessons from the skeletal muscle satellite cell.  
460 *Cell Stem Cell*, 10, 504-14.
- 461 BUCKINGHAM, M. & RIGBY, P. W. 2014. Gene regulatory networks and transcriptional mechanisms that  
462 control myogenesis. *Dev Cell*, 28, 225-38.
- 463 CAIRNS, R. A., HARRIS, I. S. & MAK, T. W. 2011. Regulation of cancer cell metabolism. *Nature Reviews*  
464 *Cancer*, 11, 85-95.
- 465 CANTO, C., JIANG, L. Q., DESHMUKH, A. S., MATAKI, C., COSTE, A., LAGOUGE, M., ZIERATH, J. R. & AUWERX,  
466 J. 2010. Interdependence of AMPK and SIRT1 for metabolic adaptation to fasting and exercise in  
467 skeletal muscle. *Cell Metab*, 11, 213-9.



- 468 CHANETON, B., HILLMANN, P., ZHENG, L., MARTIN, A. C. L., MADDOCKS, O. D. K., CHOKKATHUKALAM, A.,  
469 COYLE, J. E., JANKEVICS, A., HOLDING, F. P., VOUSDEN, K. H., FREZZA, C., O'REILLY, M. & GOTTLIEB,  
470 E. 2012. Serine is a natural ligand and allosteric activator of pyruvate kinase M2. *Nature*, 491, 458-  
471 462.
- 472 COMAI, G. & TAJBAKSHI, S. 2014. Molecular and cellular regulation of skeletal myogenesis. *Curr Top Dev*  
473 *Biol*, 110, 1-73.
- 474 DAVID, C. J., CHEN, M., ASSANAH, M., CANOLL, P. & MANLEY, J. L. 2010. HnRNP proteins controlled by c-  
475 Myc deregulate pyruvate kinase mRNA splicing in cancer. *Nature*, 463, 364-8.
- 476 DAYTON, T. L., JACKS, T. & VANDER HEIDEN, M. G. 2016. PKM2, cancer metabolism, and the road ahead.  
477 *EMBO Rep*, 17, 1721-1730.
- 478 DEATO, M. D., MARR, M. T., SOTTERO, T., INOUE, C., HU, P. & TJIAN, R. 2008. MyoD targets TAF3/TRF3  
479 to activate myogenin transcription. *Mol Cell*, 32, 96-105.
- 480 DELL'ORSO, S., JUAN, A. H., KO, K. D., NAZ, F., PEROVANOVIC, J., GUTIERREZ-CRUZ, G., FENG, X. &  
481 SARTORELLI, V. 2019. Single cell analysis of adult mouse skeletal muscle stem cells in homeostatic  
482 and regenerative conditions. *Development*, 146.
- 483 FENG, Q., JAGANNATHAN, S. & BRADLEY, R. K. 2017. The RNA Surveillance Factor UPF1 Represses  
484 Myogenesis via Its E3 Ubiquitin Ligase Activity. *Mol Cell*, 67, 239-251 e6.
- 485 FOLMES, C. D. L., DZEJA, P. P., NELSON, T. J. & TERZIC, A. 2012. Metabolic Plasticity in Stem Cell  
486 Homeostasis and Differentiation. *Cell Stem Cell*, 11, 596-606.
- 487 FULCO, M., CEN, Y., ZHAO, P., HOFFMAN, E. P., MCBURNEY, M. W., SAUVE, A. A. & SARTORELLI, V. 2008.  
488 Glucose restriction inhibits skeletal myoblast differentiation by activating SIRT1 through AMPK-  
489 mediated regulation of Nampt. *Dev Cell*, 14, 661-73.
- 490 FULCO, M. & SARTORELLI, V. 2008. Comparing and contrasting the roles of AMPK and SIRT1 in metabolic  
491 tissues. *Cell Cycle*, 7, 3669-79.
- 492 HITOSUGI, T., KANG, S., VANDER HEIDEN, M. G., CHUNG, T. W., ELF, S., LYTHGOE, K., DONG, S., LONIAL, S.,  
493 WANG, X., CHEN, G. Z., XIE, J., GU, T. L., POLAKIEWICZ, R. D., ROESEL, J. L., BOGGON, T. J., KHURI,  
494 F. R., GILLILAND, D. G., CANTLEY, L. C., KAUFMAN, J. & CHEN, J. 2009. Tyrosine phosphorylation  
495 inhibits PKM2 to promote the Warburg effect and tumor growth. *Sci Signal*, 2, ra73.
- 496 HSU, P. P. & SABATINI, D. M. 2008. Cancer cell metabolism: Warburg and beyond. *Cell*, 134, 703-707.
- 497 ISRAELEN, W. J., DAYTON, T. L., DAVIDSON, S. M., FISKE, B. P., HOSIOS, A. M., BELLINGER, G., LI, J., YU, Y.,  
498 SASAKI, M., HORNER, J. W., BURGA, L. N., XIE, J., JURCZAK, M. J., DEPINHO, R. A., CLISH, C. B.,  
499 JACKS, T., KIBBEY, R. G., WULF, G. M., DI VIZIO, D., MILLS, G. B., CANTLEY, L. C. & VANDER HEIDEN,  
500 M. G. 2013. PKM2 isoform-specific deletion reveals a differential requirement for pyruvate kinase  
501 in tumor cells. *Cell*, 155, 397-409.
- 502 KELLER, K. E., TAN, I. S. & LEE, Y. S. 2012. SAICAR stimulates pyruvate kinase isoform M2 and promotes  
503 cancer cell survival in glucose-limited conditions. *Science*, 338, 1069-72.
- 504 LAGIRAND-CANTALOUBE, J., CORNILLE, K., CSIBI, A., BATONNET-PICHON, S., LEIBOVITCH, M. P. &  
505 LEIBOVITCH, S. A. 2009. Inhibition of atrogen-1/MAFbx mediated MyoD proteolysis prevents  
506 skeletal muscle atrophy in vivo. *PLoS One*, 4, e4973.
- 507 LI, L., MARTINEZ, S. S., HU, W., LIU, Z. & TJIAN, R. 2015. A specific E3 ligase/deubiquitinase pair modulates  
508 TBP protein levels during muscle differentiation. *Elife*, 4, e08536.
- 509 LI, M., ZHANG, C. S., ZONG, Y., FENG, J. W., MA, T., HU, M., LIN, Z., LI, X., XIE, C., WU, Y., JIANG, D., LI, Y.,  
510 ZHANG, C., TIAN, X., WANG, W., YANG, Y., CHEN, J., CUI, J., WU, Y. Q., CHEN, X., LIU, Q. F., WU, J.,  
511 LIN, S. Y., YE, Z., LIU, Y., PIAO, H. L., YU, L., ZHOU, Z., XIE, X. S., HARDIE, D. G. & LIN, S. C. 2019.  
512 Transient Receptor Potential V Channels Are Essential for Glucose Sensing by Aldolase and AMPK.  
513 *Cell Metab*, 30, 508-524 e12.

- 514 MENG, Z. X., GONG, J., CHEN, Z., SUN, J., XIAO, Y., WANG, L., LI, Y., LIU, J., XU, X. Z. S. & LIN, J. D. 2017.  
515 Glucose Sensing by Skeletal Myocytes Couples Nutrient Signaling to Systemic Homeostasis. *Mol*  
516 *Cell*, 66, 332-344 e4.
- 517 MOUSSAIEFF, A., ROULEAU, M., KITSBERG, D., COHEN, M., LEVY, G., BARASCH, D., NEMIROVSKI, A., SHEN-  
518 ORR, S., LAEVSKY, I., AMIT, M., BOMZE, D., ELENA-HERRMANN, B., SCHERF, T., NISSIM-RAFINIA,  
519 M., KEMPA, S., ITSKOVITZ-ELDOR, J., MESHORER, E., ABERDAM, D. & NAHMIAS, Y. 2015.  
520 Glycolysis-mediated changes in acetyl-CoA and histone acetylation control the early  
521 differentiation of embryonic stem cells. *Cell Metab*, 21, 392-402.
- 522 MULLER, T., BROHMANN, H., PIERANI, A., HEPPENSTALL, P. A., LEWIN, G. R., JESSELL, T. M. & BIRCHMEIER,  
523 C. 2002. The homeodomain factor *lhx1* distinguishes two major programs of neuronal  
524 differentiation in the dorsal spinal cord. *Neuron*, 34, 551-62.
- 525 NOY, T., SUAD, O., TAGLICH, D. & CIECHANOVER, A. 2012. HUWE1 ubiquitinates MyoD and targets it for  
526 proteasomal degradation. *Biochem Biophys Res Commun*, 418, 408-13.
- 527 OUSTANINA, S., HAUSE, G. & BRAUN, T. 2004. Pax7 directs postnatal renewal and propagation of  
528 myogenic satellite cells but not their specification. *EMBO J*, 23, 3430-9.
- 529 PEARCE, E. L. & PEARCE, E. J. 2013. Metabolic Pathways in Immune Cell Activation and Quiescence.  
530 *Immunity*, 38, 633-643.
- 531 SANDRI, M., SANDRI, C., GILBERT, A., SKURK, C., CALABRIA, E., PICARD, A., WALSH, K., SCHIAFFINO, S.,  
532 LECKER, S. H. & GOLDBERG, A. L. 2004. Foxo transcription factors induce the atrophy-related  
533 ubiquitin ligase atrogin-1 and cause skeletal muscle atrophy. *Cell*, 117, 399-412.
- 534 THERET, M., GSAIER, L., SCHAFFER, B., JUBAN, G., BEN LARBI, S., WEISS-GAYET, M., BULTOT, L., COLLODET,  
535 C., FORETZ, M., DESPLANCHES, D., SANZ, P., ZANG, Z., YANG, L., VIAL, G., VIOLLET, B., SAKAMOTO,  
536 K., BRUNET, A., CHAZAUD, B. & MOUNIER, R. 2017. AMPKalpha1-LDH pathway regulates muscle  
537 stem cell self-renewal by controlling metabolic homeostasis. *EMBO J*, 36, 1946-1962.
- 538 VOGLER, T. O., GADEK, K. E., CADWALLADER, A. B., ELSTON, T. L. & OLWIN, B. B. 2016. Isolation, Culture,  
539 Functional Assays, and Immunofluorescence of Myofiber-Associated Satellite Cells. *Methods Mol*  
540 *Biol*, 1460, 141-62.
- 541 VON MALTZAHN, J., JONES, A. E., PARKS, R. J. & RUDNICKI, M. A. 2013. Pax7 is critical for the normal  
542 function of satellite cells in adult skeletal muscle. *Proc Natl Acad Sci U S A*, 110, 16474-9.
- 543 WANG, X., LU, G., LI, L., YI, J., YAN, K., WANG, Y., ZHU, B., KUANG, J., LIN, M., ZHANG, S. & SHAO, G. 2014.  
544 HUWE1 interacts with BRCA1 and promotes its degradation in the ubiquitin-proteasome pathway.  
545 *Biochem Biophys Res Commun*, 444, 290-5.
- 546 YANG, W., ZHENG, Y., XIA, Y., JI, H., CHEN, X., GUO, F., LYSSIOTIS, C. A., ALDAPE, K., CANTLEY, L. C. & LU, Z.  
547 2012. ERK1/2-dependent phosphorylation and nuclear translocation of PKM2 promotes the  
548 Warburg effect. *Nat Cell Biol*, 14, 1295-304.
- 549 YIN, H., PRICE, F. & RUDNICKI, M. A. 2013. Satellite cells and the muscle stem cell niche. *Physiol Rev*, 93,  
550 23-67.
- 551 YUCEL, N., WANG, Y. X., MAI, T., PORPIGLIA, E., LUND, P. J., MARKOV, G., GARCIA, B. A., BENDALL, S. C.,  
552 ANGELO, M. & BLAU, H. M. 2019. Glucose Metabolism Drives Histone Acetylation Landscape  
553 Transitions that Dictate Muscle Stem Cell Function. *Cell Rep*, 27, 3939-3955 e6.

554

555

556

557

558

559 **Figure legends**

560 **Figure 1. Glucose regulates MyoD protein stability via ubiquitination.**

561 (A) C2C12 cells were differentiated at indicated glucose concentrations and analyzed by Western  
562 blotting.

563 (B) Samples from (A) at day 2 were analyzed by RT-qPCR for MyoD or MyoG (n=3).

564 (C) Cells were incubated in proliferation media (10% FBS) with a range of glucose concentrations  
565 overnight and analyzed by Western blotting or RT-qPCR (n=3).

566 (D) Cells were treated with 25mM 2DG in glucose free media for indicated time and analyzed by  
567 Western blotting or RT-qPCR (n=3).

568 (E) Cells were transfected with Flag-MyoD construct and treated with 2DG for 4 hours before  
569 harvesting.

570 (F) Cells were incubated in amino acid free media for one hour. Loss of p-S6K was used to confirm  
571 amino acid starvation response.

572 (G) Cells were cultured in 25mM or 5mM glucose media for one day and chased after 20μM CHX  
573 treatment.

574 (H) Cells were treated with 2DG in the presence or absence of 20μM MG132 for 4 hours.

575 (I) Cells were cultured in 25mM or 5mM glucose media for one day and incubated with 20μM  
576 MG132 for 4 hours. Cell lysates were immunoprecipitated with an anti-MyoD antibody to access  
577 ubiquitination.

578 Western blot results were validated in two or more independent experiments. Error bars indicate  
579 S.E.M. Paired Student's t-test (two-tailed) was performed. \*, p<0.05. \*\*, p<0.01.

580

581 **Figure 2. Cellular energy per se do not regulate MyoD**

582 (A) Parental C2C12 or two Ampkα1/2 dKO clones were treated with 2DG for 4 hours.

583 (B) Cells were treated with 2DG in the presence or absence of 10μM EX527 (Sirt1 inhibitor).

584 (C) Cells were co-treated with increasing concentrations of pyruvate and 2DG for 4 hours.

585 All results were validated in two or more independent experiments.

586

587 **Figure 3. PKM2 is the responsible sensor of FBP for regulation of MyoD.**

588 (A) Diagram of glycolysis pathway.

589 (B) Diagram illustrating the regulation of Pyruvate Kinase M gene by alternative splicing in  
590 myofibers and myoblasts, and different biochemical properties of PKM1 and PKM2. Myofibers  
591 use exon 9 to express PKM1 whereas myoblasts use exon 10 to express PKM2. FBP (fructose 1,6-  
592 bisphosphate), DASA-58 and TEPP-46 stabilize PKM2 tetramer.

593 (C) Cells were permeabilized with Streptolysin-O (SLO), and treated with 2DG and indicated  
594 metabolites (200 $\mu$ M) for 2 hours. DHAP, dihydroxyacetone phosphate. G3P, glyceraldehyde 3-  
595 phosphate.

596 (D) Cells were co-treated with 2DG and PKM2 tetramer stabilizing reagents (100 $\mu$ M) for 4 hours.  
597 All results were validated in two or more independent experiments.

598

599 **Figure 4. Huwe1 E3 ubiquitin ligase translocates to the nucleus following glycolysis**  
600 **inhibition, which is opposed by PKM2 tetramer.**

601 (A) C2C12 cells were transfected with two different siRNAs against Huwe1 and treated with 2DG  
602 for 4 hours.

603 (B) Cells treated with 2DG for indicated time were fractionated to cytosolic and nuclear lysates.  
604 Lamin B is a nuclear marker and  $\beta$ -Tubulin is a cytosolic marker.

605 (C) Cells were incubated in proliferation media with different glucose concentrations for one day  
606 and fractionated as in (B).

607 (D) After 4 hours treatment with 2DG, cells were immunostained for Huwe1. Scale bar, 20 $\mu$ m.

608 (E) Cells were treated as indicated for 4 hours and fractionated.

609 (F) Control or PKM2 siRNA transfected cells were immunostained for Huwe1. Scale bar, 10 $\mu$ m.

610 (G) Endogenous PKM2 was depleted using PKM2 siRNA (#1 in Fig. EV2C) followed by  
611 transfection with Flag-tagged human PKM2 WT or PKM2 S437Y mutant. Lysates were  
612 immunoprecipitated using antibody against Flag.

613 (H) Model of MyoD regulation by FBP-PKM2-Huwe1 axis. FBP, fructose 1,6-bisphosphate.

614 All results were validated in two or more independent experiments. Scales in (B) and (F), 10 $\mu$ m.

615

616 **Figure 5. Inhibition of PKM2-Huwe1 axis restores myogenic differentiation in glucose**  
617 **restricted conditions.**

618 (A) Representative images of MyoG immunostaining in (B) and (C). Scale bar, 20 $\mu$ m

619 (B) Huwe1 was depleted by siRNA in C2C12 cells, and differentiation was induced in 25mM or  
620 5mM glucose media. Percentages of MyoG positive cells were quantified over at least 500 nuclei  
621 per sample (n=3).

622 (C) Confluent C2C12 cells were induced to differentiate in 25mM or 5mM glucose media with or  
623 without 5 $\mu$ M TEPP-46. Percentages of MyoG positive cells were quantified as in (A) (n=3).

624 (D) Left, diagram describing stem cell activation and differentiation in cultured myofibers. Right,  
625 isolated mouse EDL fibers were transfected with siRNAs against Huwe1 and were cultured for  
626 three days in 25mM or 2.5mM glucose media. Stem cell differentiation was accessed by  
627 Pax7/MyoG co-staining (n=3).

628 Note that 1mM pyruvate was added in all experiments. Error bars indicated S.E.M. Paired  
629 Student's t-test (two-tailed) was performed. \*, p<0.05. \*\*, p<0.01.

630

631 **Figure Extended View 1. Atrogin-1 and Upf1 are not involved in the regulation of MyoD by**  
632 **2DG.**

633 (A) Cells were co-treated with 2DG and 10 $\mu$ M MLN4924 (Atrogin-1 inhibitor) for 4 hours.

634 (B) Cells were transfected with two different siRNAs against Upf1 and treated with 2DG for 4  
635 hours.

636 All results were validated in two or more independent experiments.

637

638 **Figure Extended View 2. Loss of PKM2 decreases MyoD protein.**

639 (A) Huwe1 immunostaining in Huwe1 siRNA transfected cells validate the specificity of the  
640 antibody. Scale bar, 20 $\mu$ m.

641 (B) C2C12 cells were transfected with two different siRNAs against PKM2 and treated with 2DG  
642 for 4 hours.

643 (C) Samples from (B) were analyzed for MyoD mRNA level by RT-qPCR (n=3).

644

645 **Figure Extended View 3. Prolonged loss of Huwe1 can impair myogenic differentiation.**

646 C2C12 cells with stable knock-down of Huwe1 by shRNA (maintained more than 2 weeks) were  
647 induced to differentiate in 25mM glucose media condition.

648

649 **Figure Extended View 4. Lowering glucose impairs differentiation in cultured EDL**  
650 **myofibers.**

651 (A) Isolated mouse EDL fibers were first cultured in 25mM glucose media for 24 hours. On the  
652 second day, media were switched to 25mM, 5mM, or 2.5mM glucose and cultured for three more  
653 days. Differentiating and undifferentiated stem cells were detected by immunostaining for MyoG  
654 and Pax7, respectively (n=3).

655 (B) This culture condition does not affect cell proliferation. Numbers of cells per myogenic colony  
656 are quantified (n=3).

657 Note that 1mM pyruvate was added in all experiments. Error bars indicated S.E.M. Paired  
658 Student's t-test (two-tailed) was performed. \*, p<0.05. \*\*, p<0.01.

## Fig. 1

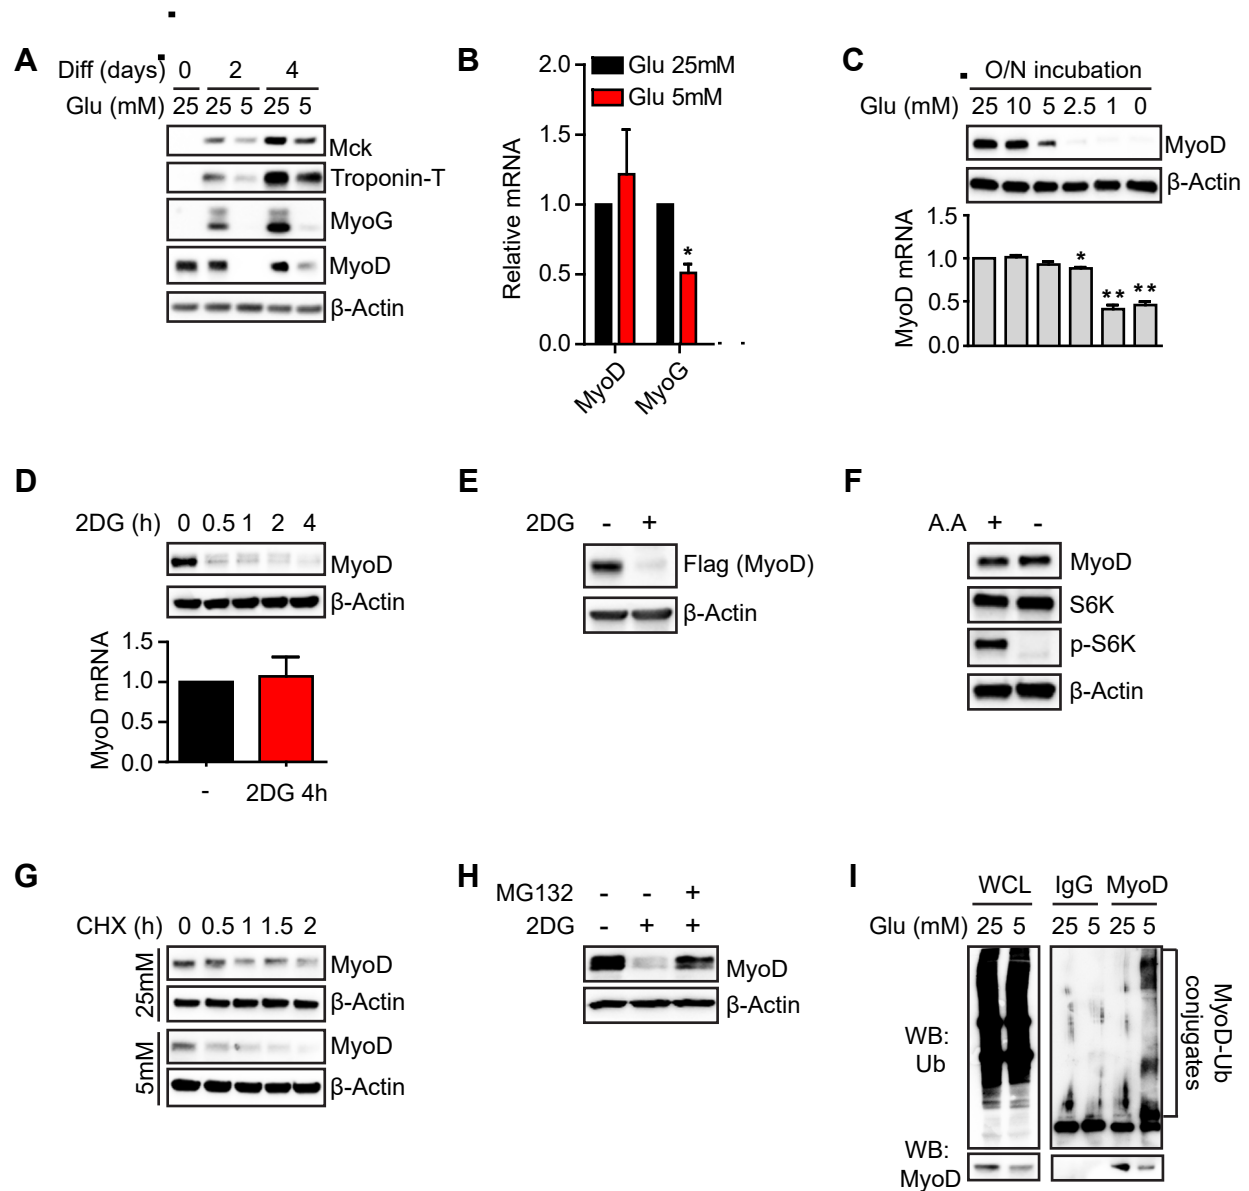



**Fig. 2**

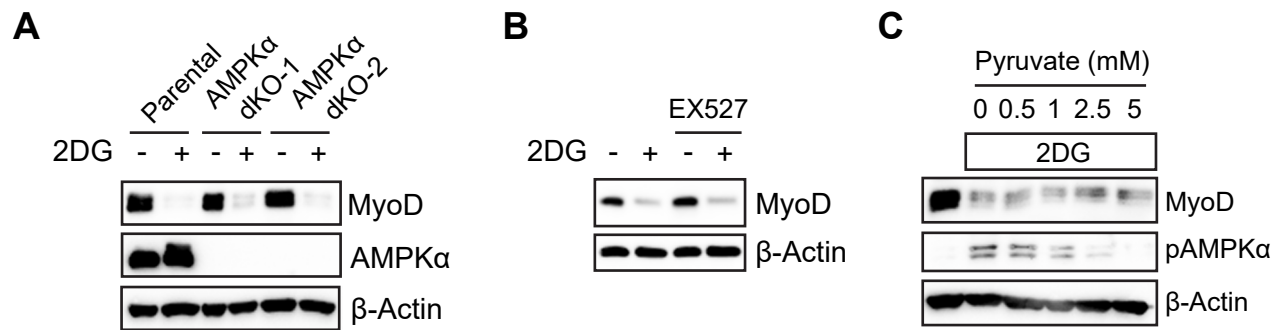

**Fig. 3**

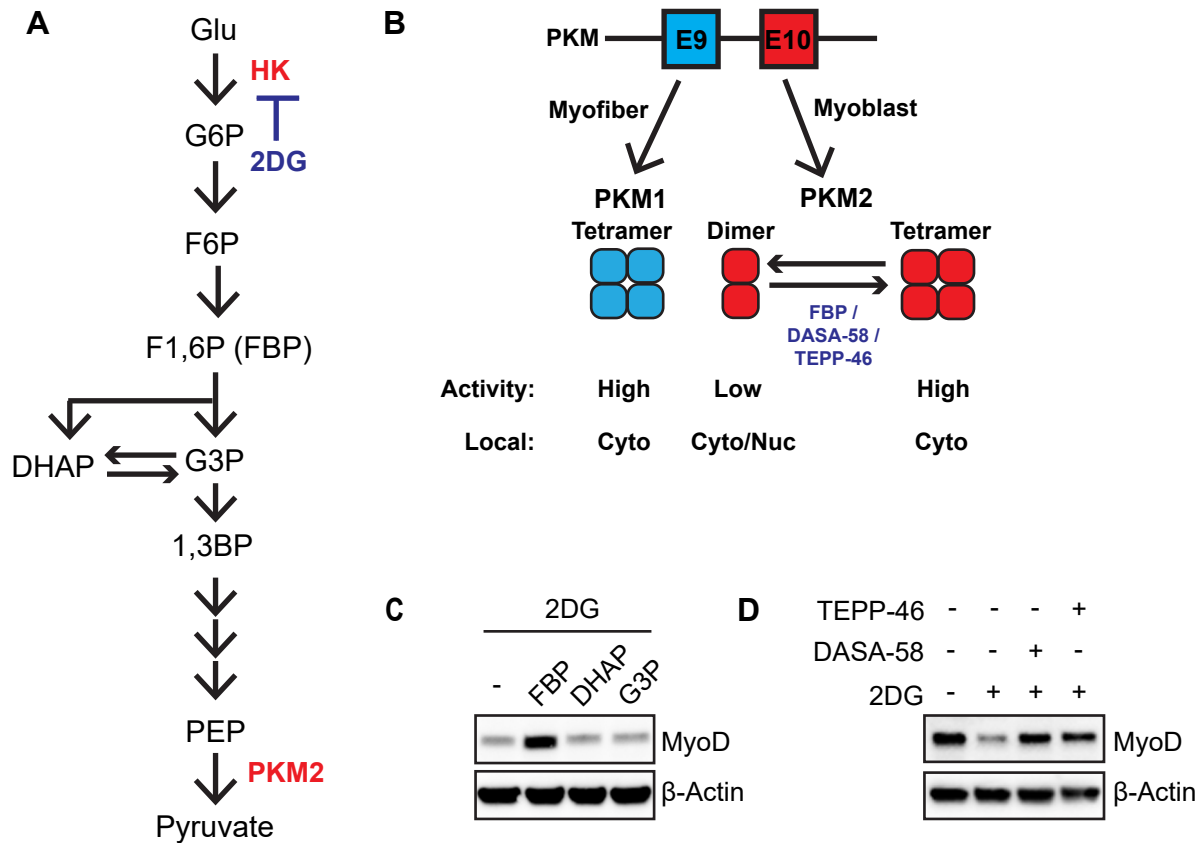

## Fig. 4

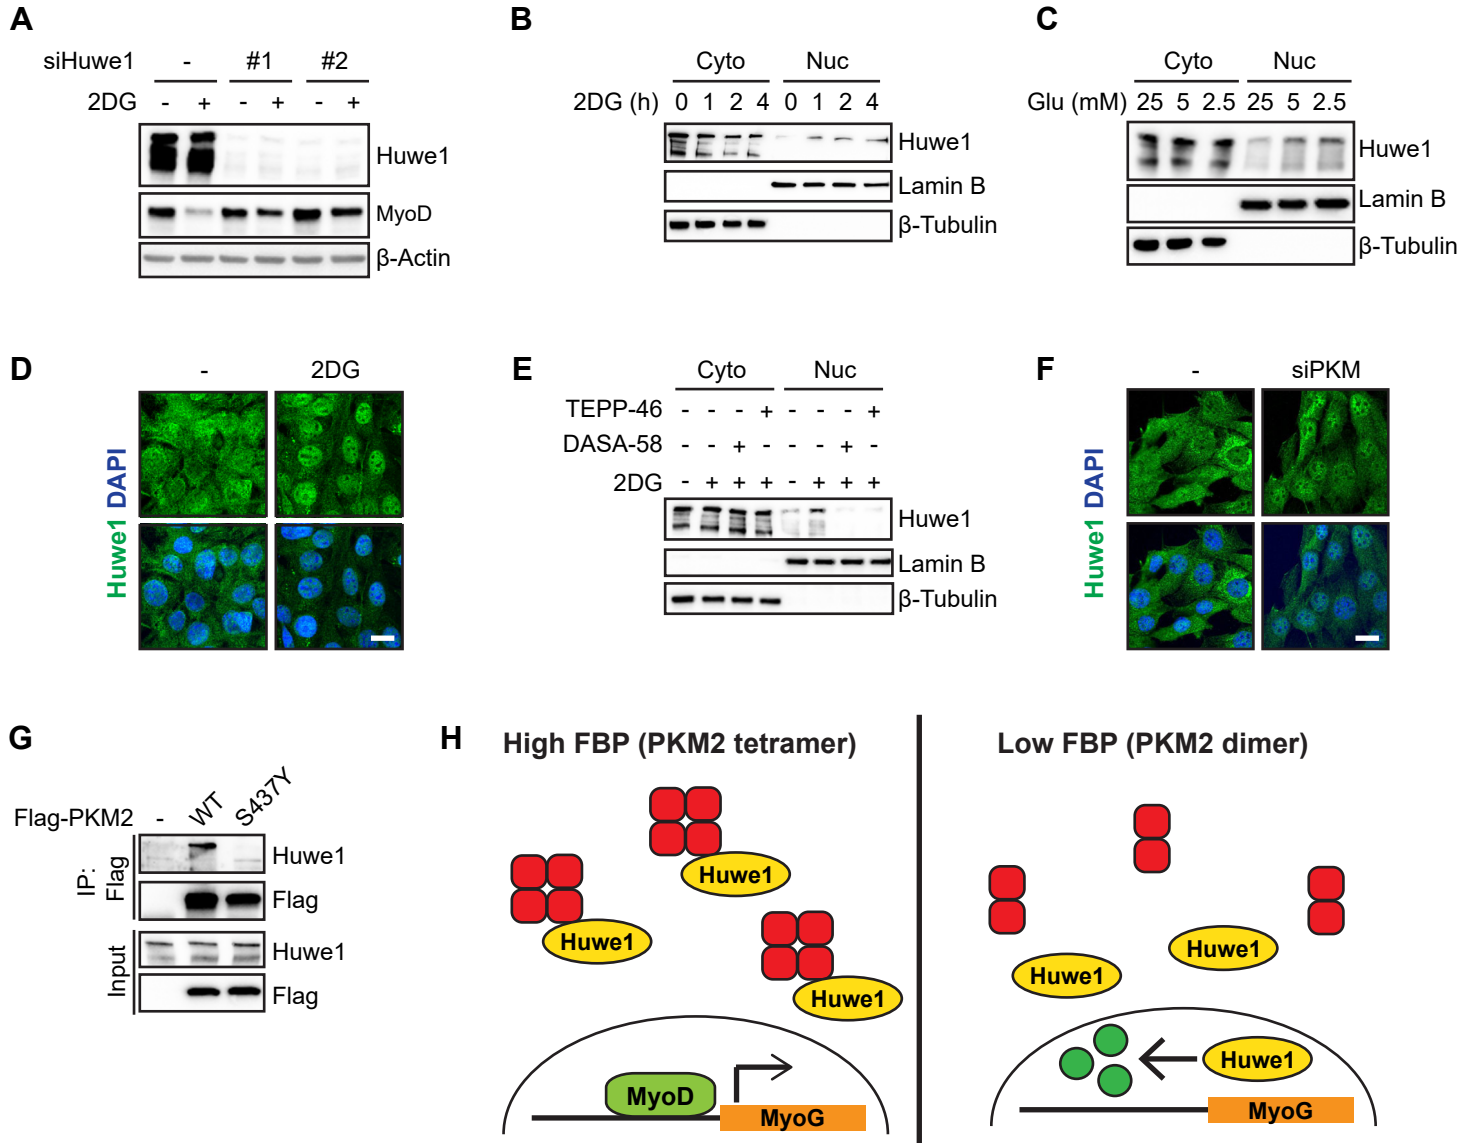

## Fig. 5

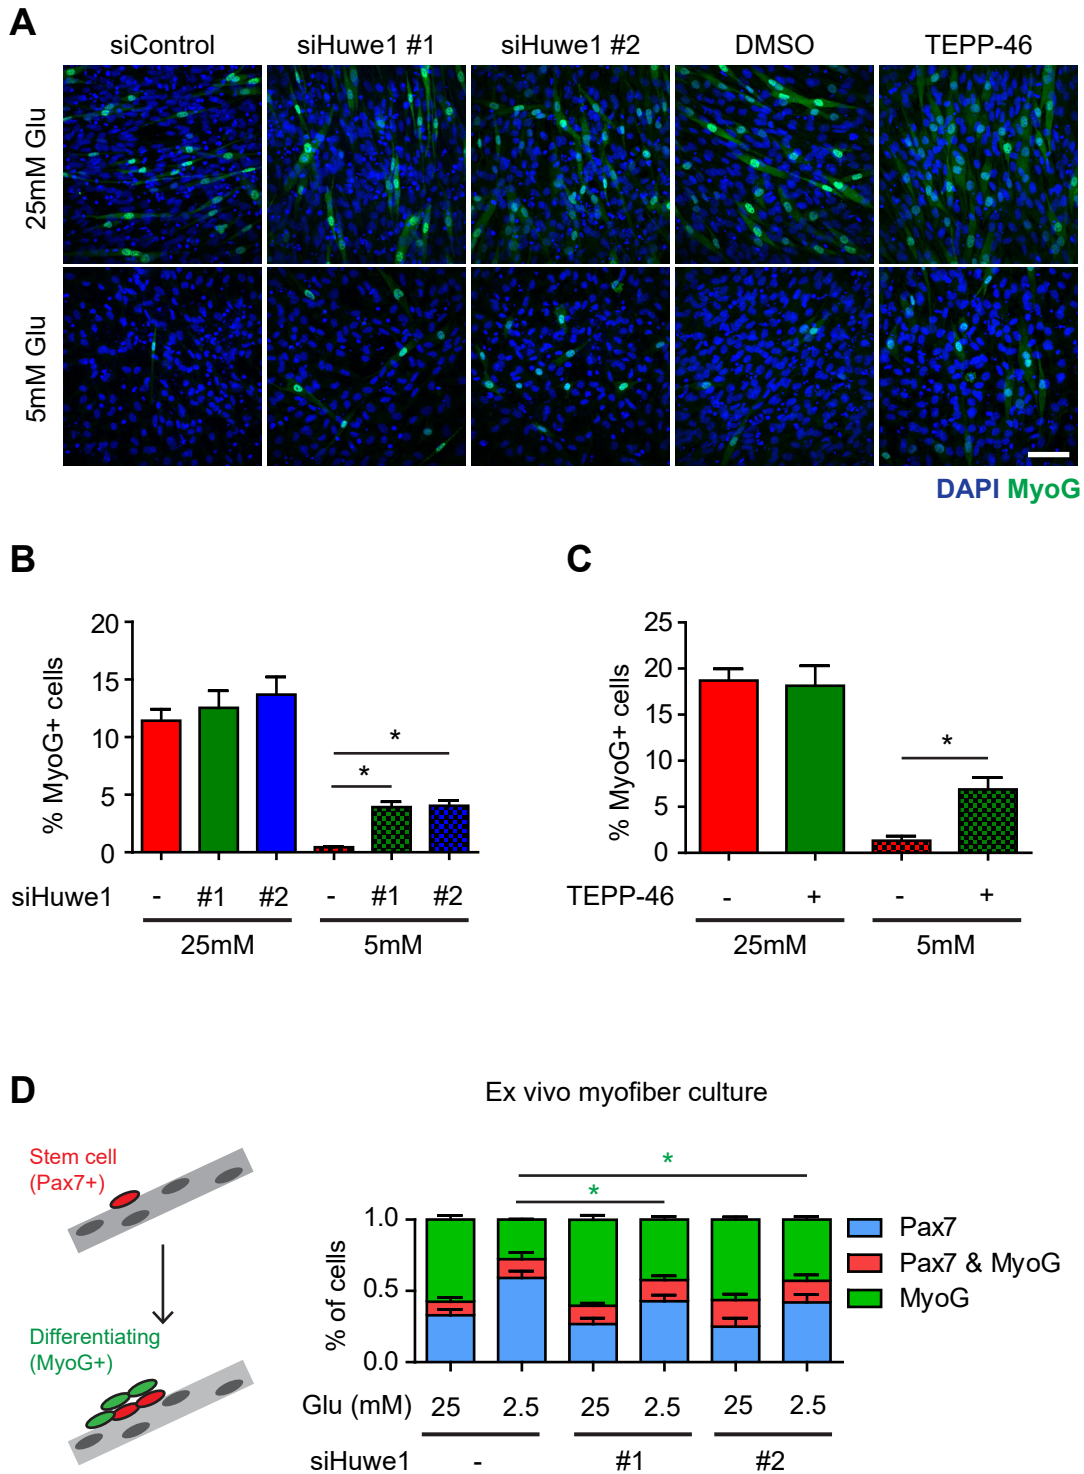

## Fig. S1

**A**

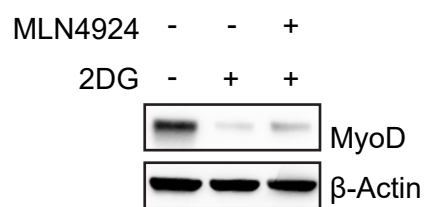

**B**

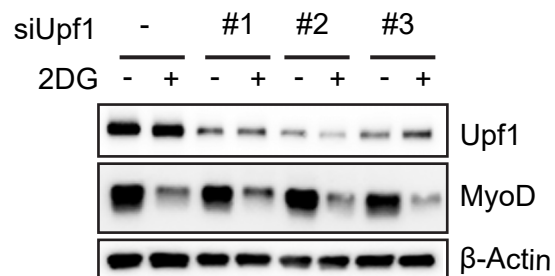

**Fig. S2**

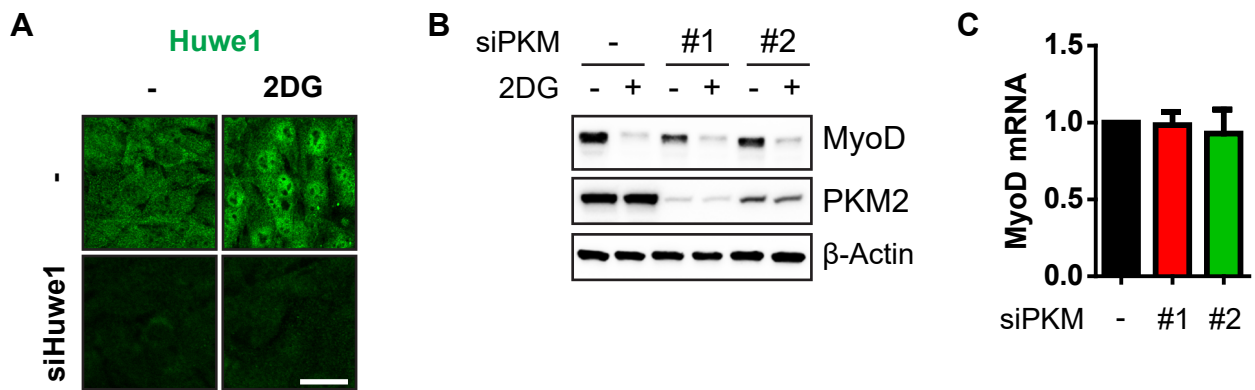

### Fig. S3

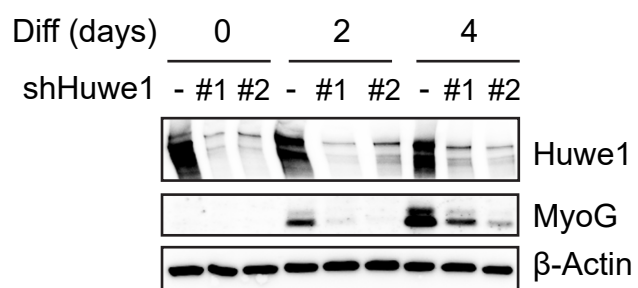



**Fig. S4**

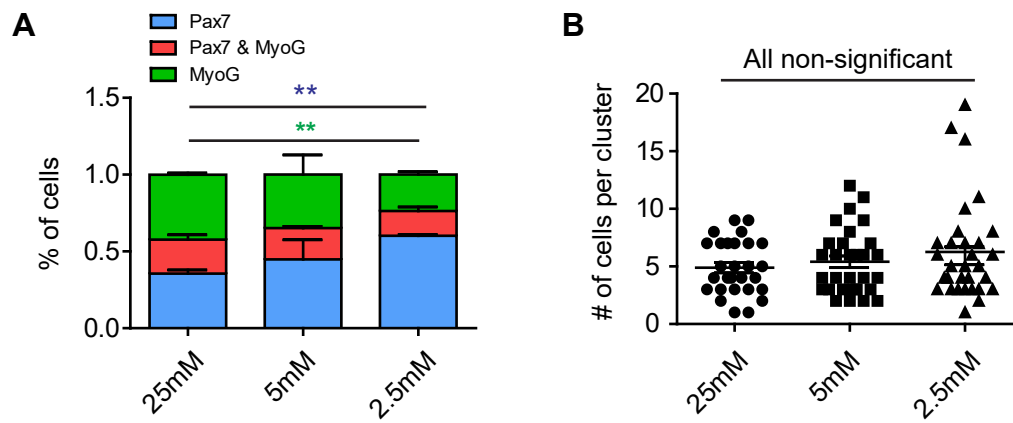

Source: http://biorxiv.org/content/10.1101/2020.12.22.424062v1.full.pdf
